# Supplementary material for: The ϕPA3 phage nucleus is enclosed by a self-assembling 2D crystalline lattice
Source: PubMed Central journal article supplement (PMC9938867; doi:10.1038/s41467-023-36526-9), 2023-02-18
Supplement: 41467_2023_36526_MOESM3_ESM.pdf [file 41467_2023_36526_MOESM3_ESM.pdf]

**File name: Supplementary Movie 1**

**Description:** Movie showing a morph between the same 2D class rotated by  $\sim 90^\circ$  after aligning on the asymmetric PhuN-O and PhuN-C subunits. The  $\sim 20 \text{ \AA}$  lattice/ $\beta$ -hairpin shift is visible.
